# Supplementary material for: Atrasentan increased the expression of klotho by mediating miR-199b-5p and prevented renal tubular injury in diabetic nephropathy
Source: PubMed Central journal article supplement (PMC4728478; doi:10.1038/srep19979), 2016-01-27
Supplement: srep19979-s1.pdf [file srep19979-s1.pdf]

**Atrasentan increased the expression of klotho by mediating miR-199b-5p and prevented renal tubular injury in diabetic nephropathy**

Wen-Ling Kang <sup>1,2</sup>, Gao-Si Xu <sup>3\*</sup>

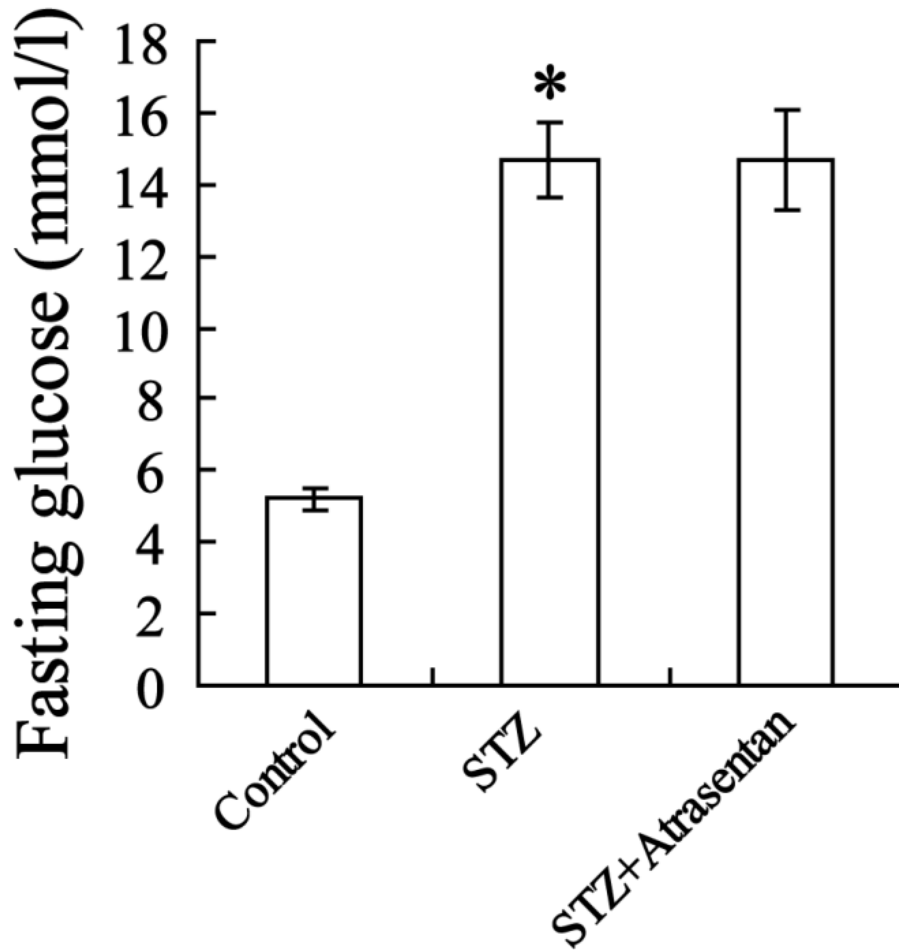

Suppl. 1 The effects of atrasentan on fasting blood-glucose of STZ-induced DN mice.
